# Supplementary material for: Survival of Patients with Multi-Level Malignant Bowel Obstruction on Total Parenteral Nutrition at Home
Source: MDPI journal article supplement (doi:10.3390/nu13030889), 2021-03-10
Supplement: s1 [file s1]

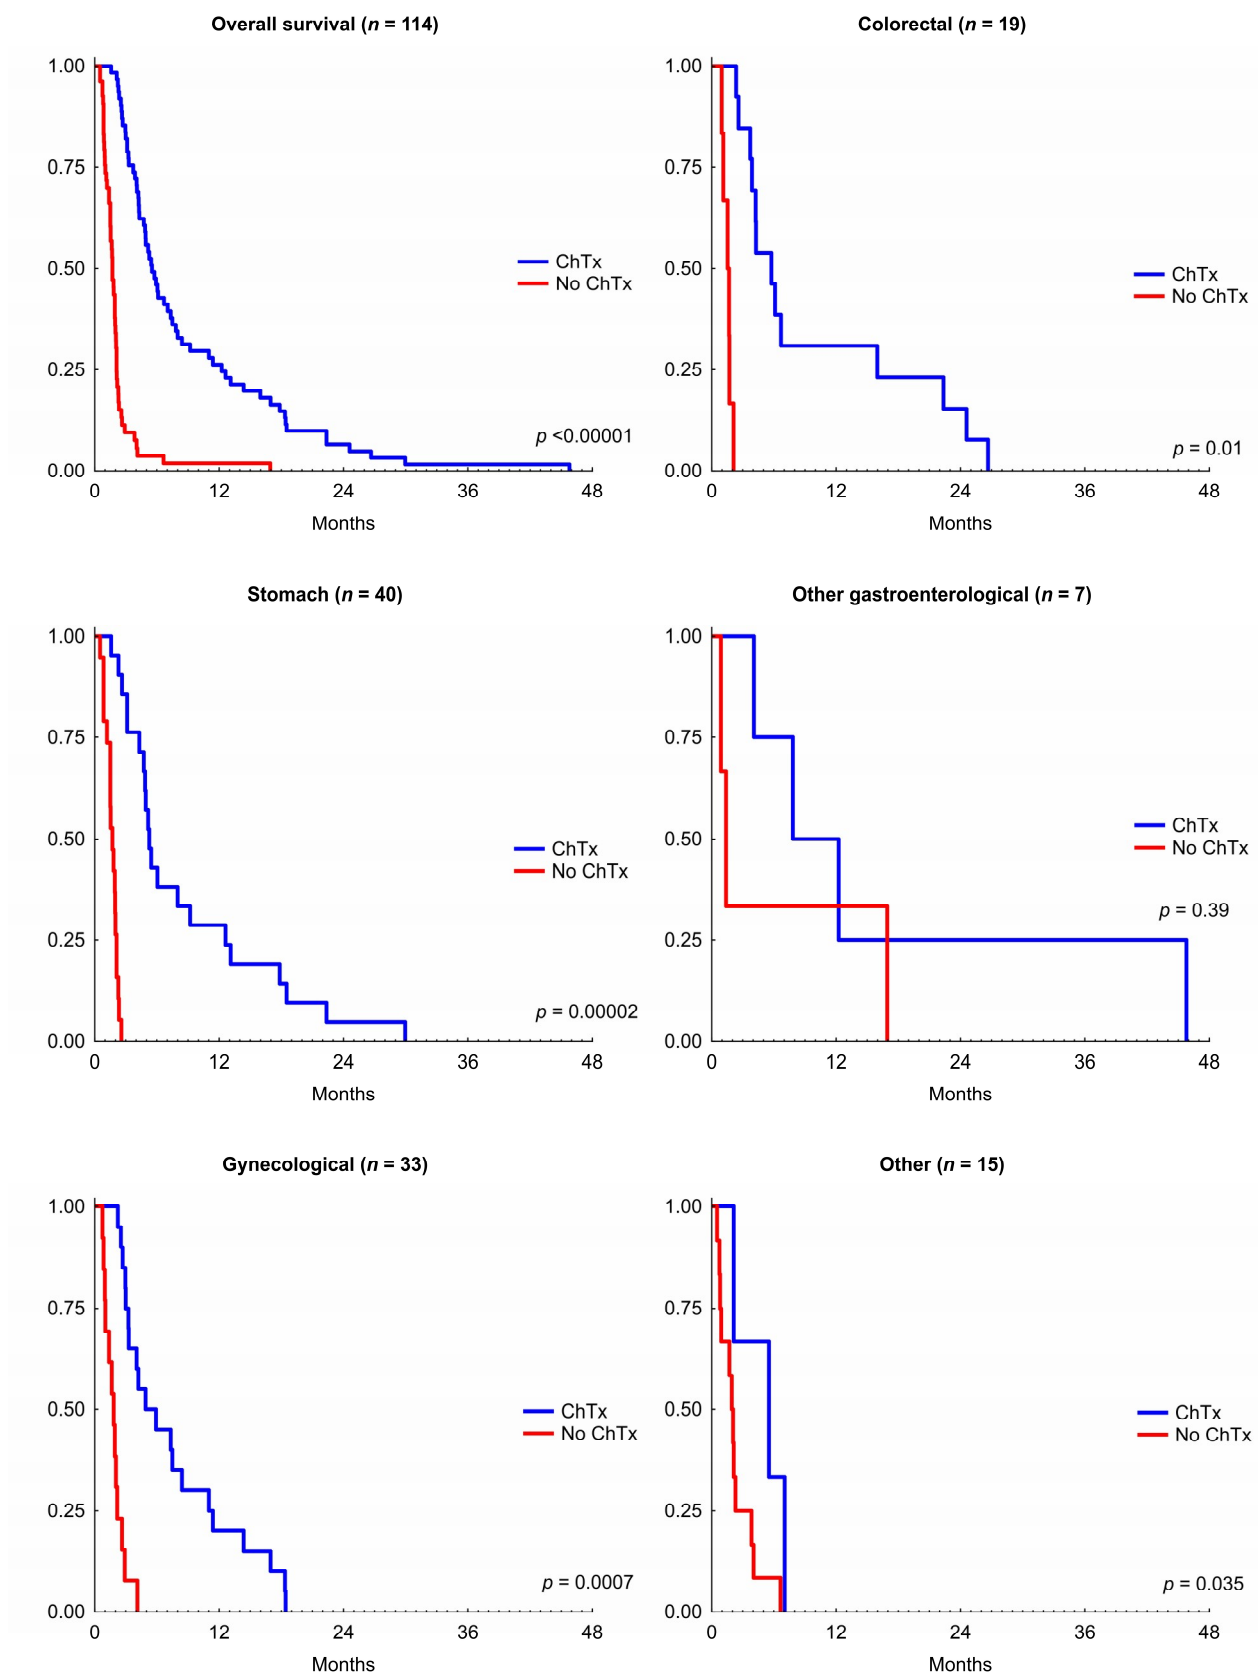

**Figure S1.** The Kaplan-Meier curves presenting the impact of chemotherapy (ChTx) on survival in cancer clusters.
